# Supplementary material for: Unifying the mechanism of mitotic exit control in a spatiotemporal logical model
Source: PubMed Central journal article supplement (PMC7685450; doi:10.1371/journal.pbio.3000917), 2020-11-12
Supplement: pbio.3000917.s011.pdf [file pbio.3000917.s011.pdf]

| Parameter     | Definition                                  | Value |
|---------------|---------------------------------------------|-------|
| $\rho$        | Standard rate of reactions in Model 6       | 0.84  |
| $\rho_{slow}$ | Rate of Tem1 activation in absence of Lte1  | 0.012 |
| $\rho_{fast}$ | Rate of Tem1 activation in presence of Lte1 | 1     |
| $\sigma$      | Rate constant of spindle alignment          | 0.14  |
| $\theta$      | Half-angular bud width                      | 0.3   |

Table S1: Parameters used to simulate SPoC competence.
