# Supplementary material for: Unifying the mechanism of mitotic exit control in a spatiotemporal logical model
Source: PubMed Central journal article supplement (PMC7685450; doi:10.1371/journal.pbio.3000917), 2020-11-12
Supplement: pbio.3000917.s012.pdf [file pbio.3000917.s012.pdf]

| Plasmid Name | Genotype                        | Type      | Selection   | Source                |
|--------------|---------------------------------|-----------|-------------|-----------------------|
| pX29         | -                               | CEN       | Leu/Amp     | Reid et al. [2011]    |
| pX78         | <i>CDC5</i>                     | 2 $\mu$ m | Leu/Amp     | Caydasi et al. [2017] |
| pX79         | <i>MOB1</i>                     | 2 $\mu$ m | Leu/Amp     | Caydasi et al. [2017] |
| pX80         | <i>MOB1</i>                     | CEN       | Ura/Amp     | Caydasi et al. [2017] |
| pHT790       | <i>MET3p-GBP-RFP</i>            | CEN       | Leu/Met/Amp | this study            |
| pHT795       | <i>MET3p-CLB2-CDC28-GBP-RFP</i> | CEN       | Leu/Met/Amp | this study            |

Table S2: Plasmids used in this study.
