# Supplementary material for: Unifying the mechanism of mitotic exit control in a spatiotemporal logical model
Source: PubMed Central journal article supplement (PMC7685450; doi:10.1371/journal.pbio.3000917), 2020-11-12
Supplement: pbio.3000917.s013.pdf [file pbio.3000917.s013.pdf]

| Strain name | Genotype                                                          | Source                  |
|-------------|-------------------------------------------------------------------|-------------------------|
| CKY329-3    | <i>mob1Δ::klTRP1</i>                                              | Caydasi et al. [2017]   |
| T744        | <i>CDC14-CFP::shHPH HIS3p-mRuby2-TUB1+3'UTR::URA3</i>             | this study              |
| pT747       | <i>CDC14-CFP::shHPH HIS3p-mRuby2-TUB1+3'UTR::URA3 spo12Δ::KAN</i> | this study              |
| E438        | -                                                                 | Brachmann et al. [1998] |
| T724        | <i>CDC15-YFP::KAN</i>                                             | this study              |
| T725        | <i>TEM1-YFP</i>                                                   | this study              |
| Nud1-GFP    | <i>Nud1-GFP::HIS3</i>                                             | Huh et al. [2003]       |
| pHT795      | <i>Nud1-GFP::HIS3 bfa1Δ::KAN</i>                                  | this study              |

Table S3: Strains used in this study.
