# Supplementary material for: Unifying the mechanism of mitotic exit control in a spatiotemporal logical model
Source: PLoS Biol. 2020 Nov 12;18(11):e3000917. doi: 10.1371/journal.pbio.3000917 (PMC7685450; doi:10.1371/journal.pbio.3000917)
Supplement: S11 File — “Number” columns shows the number of cells of each strain, and each methionine concentration were counted in each cell cycle stage; “Percentage” columns show the percentage of cells in each cell cycle stage. (XLSX) [file pbio.3000917.s024.xlsx]

## Sheet: Sheet1
This table summarises the data from live cell imaging of cells expressing CDK-GBP, from MET3p. 'Number' columns shows the number of cells of each strain and each methionine concentration were counted in each cell cycle stage, 'Percentage' columns show the percentage of cells in each cell cycle stage.
Strain	Nud1-GFP		Nud1-GFP bfa1∆		Nud1-GFP		Nud1-GFP bfa1∆
Methionine conc/mM	0.01		0.01		2		2
Cell Cycle Phase	Number	Percentage	Number	Percentage	Number	Percentage	Number	Percentage
anaphase	79	64.7541	43	32.8244	24	19.0476	43	28.4768
metaphase	23	18.8525	51	38.9313	58	46.0317	67	44.3709
G1	8	6.55738	27	20.6107	43	34.127	37	24.5033
abnormal	12	9.83607	10	7.63359	1	0.793651	4	2.64901
total	122		131		126		151
