# Supplementary material for: Unifying the mechanism of mitotic exit control in a spatiotemporal logical model
Source: PLoS Biol. 2020 Nov 12;18(11):e3000917. doi: 10.1371/journal.pbio.3000917 (PMC7685450; doi:10.1371/journal.pbio.3000917)
Supplement: S12 File — The first sheet contains example data showing mean length of anaphase in simulated wild-type cells for differing values of ρ. The second sheet contains example data showing mean length of anaphase in simulated kin4Δ cells with misaligned spindles for differing values of ρslow. The third sheet contains example data showing mean length of anaphase in simulated mutant cells for values of ρfast over 2 orders of magnitude. The fourth sheet contains example data showing percentage of binucleate cells in simulated mutant cells for differing values of σ. (XLSX) [file pbio.3000917.s025.xlsx]

## Sheet: rho
Example data showing mean length of anaphase in simulated wild type cells for differing values of 𝜌. 𝜌 was selected so that the mean length of anaphase was 25 minutes in wild type cells.
𝜌	mean anaphase length
0.6	35.0356
0.61	34.4742
0.62	34.0917
0.63	33.3758
0.64	32.8691
0.65	32.4263
0.66	31.9517
0.67	31.4462
0.68	31.0289
0.69	30.5385
0.7	30.0744
0.71	29.5907
0.72	29.2805
0.73	28.8458
0.74	28.4716
0.75	28.0428
0.76	27.7233
0.77	27.4903
0.78	27.0984
0.79	26.7911
0.8	26.3427
0.81	26.1783
0.82	25.7959
0.83	25.4964
0.84	25.241
0.85	24.9516
0.86	24.6079
0.87	24.4328
0.88	24.1305
0.89	23.7928
0.9	23.6074
0.91	23.382
0.92	22.984
0.93	22.8515
0.94	22.5872
0.95	22.3055
0.96	22.1524
0.97	22.1093
0.98	21.6776
0.99	21.4828

## Sheet: rho_slow
Example data showing mean length of anaphase in simulated kin4∆ cells with misaligned spindles for differing values of 𝜌_slow. 𝜌_slow was selected so that the mean length of anaphase in such cells was 70 minutes.
𝜌_slow	Mean anaphase length
0.002	130.785
0.003	133.089
0.004	126.425
0.005	115.579
0.006	105.23
0.007	97.3211
0.008	89.77
0.009	83.507
0.01	78.9492
0.011	74.4409
0.012	69.7365
0.013	65.872
0.014	64.0244
0.015	61.7515
0.016	59.2126
0.017	58.1668
0.018	56.2641
0.019	54.716

## Sheet: rho_fast
Example data showing mean length of anaphase in simulated mutant cells for values of 𝜌_fast over 2 orders of manitude.
𝜌_fast	Mean anaphase length
	kin4∆	bub2∆
1	69.7854	19.7652
10	69.8261	19.0498
100	69.9864	18.955

## Sheet: sigma
Example data showing percentage of binucleate cells in simulated mutant cells for differing values of 𝝈. A value of 𝝈 roughly matching experimentally observed values of 50% for bub2∆ and 25% for kin4∆ was chosen.
𝝈	Percentage binucleate cells
	kin4∆	bub2∆
0.11	0.355298	0.598578
0.12	0.318186	0.598603
0.13	0.280487	0.523939
0.14	0.254683	0.490106
0.15	0.226606	0.468445
0.16	0.194887	0.432346
